## **High risk injection drug use and uptake of HIV prevention and treatment services among people who inject drugs in KwaZulu-Natal, South Africa**

Authors: Brian C. Zanoni<sup>a,b,c</sup>, Cecilia Milford<sup>d</sup>, Kedibone Sithole<sup>d</sup>, Nzwakie Mosery<sup>d</sup>, Michael Wilson<sup>e, f</sup>, Shannon Bosman<sup>g</sup>, Jennifer Smit<sup>d</sup>

<sup>a</sup> Emory University, Atlanta, Georgia, United States of America

<sup>b</sup> Children's Healthcare of Atlanta, Atlanta, Georgia, United States of America

<sup>c</sup> Rollins School of Public Health, Atlanta, Georgia, United States of America

<sup>d</sup> Wits MRU (MatCH Research Unit), Department of Obstetrics and Gynaecology, Faculty of Health Sciences, University of the Witwatersrand, Durban, South Africa

<sup>e</sup> Advance Access & Delivery, Durban, South Africa

<sup>f</sup> Department of Health Behaviour, University of North Carolina Gillings School of Global Public Health, Chapel Hill, NC, USA

<sup>g</sup> Centre for Community Based Research, Human Sciences Research Council, Pietermaritzburg, South Africa

### **§ Corresponding Author:**

Brian C. Zanoni, MD, MPH  
2015 Upper Gate Drive NE  
Atlanta, GA 30322  
bzanoni@emory.edu  
+1 (404) 727 - 0284

### **Word Count:**

Abstract: 130

Article: 1742

### **Abstract:**

The use of injection drugs in South Africa is increasing. HIV prevention, treatment and addiction services for people who inject drugs (PWID) in South Africa are not well documented. We conducted a mixed-methods study to understand current drug use practices and access to HIV prevention and treatment services for PWID in KwaZulu-Natal, South Africa. We used respondent-driven sampling to recruit 45 people who reported injecting opiates within the past 6 months from Durban, KwaZulu-Natal, South Africa. We found high rates of practices that increase HIV/viral hepatitis risk including the use of shared needles (43%) and direct blood injections (bluetoothing) (18%). Despite 35% of participants living with HIV, only 40% accessed antiretroviral therapy within the past year, and one accessed PrEP. None of the participants reported ever testing for Hepatitis C.

1 **Introduction:**

2 South Africa has an estimated 7.9 million (95% CI: 7.1 million – 8.8 million) individuals living  
3 with HIV, and KwaZulu-Natal has the highest HIV prevalence in the country. (1) In South Africa,  
4 there are approximately 5 million people accessing antiretroviral therapy (ART), making it the  
5 largest national antiretroviral program in the world. (1) However, hidden populations remain that  
6 are not reached in the HIV prevention and care continuum, and efforts to expand HIV  
7 prevention, HIV testing and linkage to care services in sub-Saharan Africa have largely targeted  
8 non-injection drug using communities. (2, 3) Before a recent increase in people who inject drugs  
9 (PWID) in South Africa, it was estimated that 21% of PWID in South Africa were living with HIV  
10 (2, 4) compared to 14% in the general population. (1) In the general population 74% of people  
11 living with HIV are accessing ART while only 40.5% of PWID and living with HIV are accessing  
12 ART.(2) A recent increase in injection drug use, coupled with poor access to addiction services  
13 in the forms of needle exchanges or medication assisted therapy (such as methadone or  
14 buprenorphine), has led to the increase in a sequestered population that has potential to  
15 reverse many of the investments and gains in public health access to HIV prevention and  
16 treatment services. (5) The population of PWID in South Africa spans groups of homeless, sex  
17 workers, and working-class individuals, bridging multiple social networks contributing to the  
18 potential increase in HIV incidence among individuals not targeted in typical HIV continuum  
19 interventions. (6)

20  
21 Whoonga, an opiate-based drug of abuse, has been present in KwaZulu-Natal for more than 10  
22 years, yet has only recently seen an increase in injection use. (7, 8) In the past, Whoonga was  
23 typically smoked; however, intravenous and subcutaneous administration has become more  
24 prevalent. (9) The recent increase in cases of infective endocarditis in South Africa is indicative  
25 of an increase in injection drug use. (5, 7, 8) In addition, the dangerous practice of  
26 “bluetoothing” in which blood is withdrawn from one individual who has recently injected a drug

27 and directly injected intravenously into another person, has been reported. (10, 11) Called flash-  
28 bleeding in other African countries, this practice is often performed in settings of poverty and  
29 poor access to needles or needle exchange programs. (12-14) This practice, in addition to  
30 needle sharing, has potential to increase the risk of HIV and viral hepatitis among PWID and  
31 spill over into the general population through sexual networks. (15-18)

32  
33 Given the limited data on the population of individuals using injection drugs in KwaZulu-Natal,  
34 South Africa, we conducted a mixed-methods, respondent-driven study to understand drug use  
35 practices and current access to health care in preparation for targeted prevention and treatment  
36 interventions.

37

### 38 **Methods:**

39 We used respondent driven sampling (RDS) to recruit individuals aged 18 years or older, with  
40 self-described use of injection drugs within the last 6 months, and currently living in KwaZulu-  
41 Natal, South Africa. We excluded individuals who did not speak either English or isiZulu, who  
42 were severely or visibly intoxicated, or those with severe mental or physical illness preventing  
43 participation in informed consent procedures.

44

45 We recruited three initial seed individuals (who also reported injection drug use in the past 6  
46 months) who were attending a harm reduction center in Durban, South Africa. These three seed  
47 individuals were encouraged to recruit up to three other PWID from their individual social  
48 network. Each additional participant was also asked to recruit up to three different individuals  
49 from their own social network, until we reached a total sample of 45 participants. After providing  
50 written informed consent, participants completed a facilitated questionnaire that collected  
51 information on sociodemographics, drug use, sexual behavior and network characteristics, HIV

52 testing practices, and use of HIV prevention or treatment services. Interviewers entered data  
53 directly into a REDCap database as questions were answered. (19)

54  
55 We assessed the frequency, type, and methods of drug use, information on needle  
56 procurement, use, and sharing using the National HIV Behavior Surveillance System; (20) and  
57 WHO ASSIST. (21) HIV risk assessment including sex work, number of sexual partners,  
58 condom use and frequency of condom use within the past 3 months was assessed by the Texas  
59 Christian University HIV/Hepatitis Risk Assessment. (22) We also evaluated access to health  
60 care by exploring knowledge of HIV status, HIV testing in the past 12 months, access and use  
61 of medical services in the past 12 months, knowledge and acceptability of HIV self-testing.

62  
63 For this descriptive analysis we used standard summary statistics (e.g. counts/percentages;  
64 median and interquartile range of continuous measures). Basic descriptive data analyses were  
65 performed using REDCap. Results of additional in-depth interviews are reported separately.

66  
67 This study was approved by the Institutional review Boards of Emory University, the University  
68 of Witwatersrand and the KwaZulu-Natal National Department of Health.

69

## 70 **Results:**

71 We interviewed 45 individuals in Durban, South Africa who reported recent injection drug use  
72 using respondent-driven sampling from November 1, 2021 to February 8, 2022. Participants had  
73 a median age of 28.5 years (IQR 26.6 – 32.3) and were predominantly male (58%; n=26),  
74 heterosexual (91%; n=41), had completed secondary education (87%; n=39), and were  
75 currently (76%; n=32) or recently (92%; n=42) homeless as indicated by **Table 1**.

76

77 The median reported starting age of injecting drug use was 22 years (IQR 19 – 26). The  
78 majority of participants did not use alcohol (64%; n=29) but reported use of other drugs (53%;  
79 n=24). Most participants (93%; n=42) reported use of injection drugs within the last month, with  
80 91% (n=41) reporting averaging more than one injection per day. All participants (100%)  
81 reported daily use of Whoonga. Opioid overdoses were personally experienced in 22% (n=10)  
82 of participants in the last year, with a median of 3.5 (IQR 2 – 4.75) individual episodes of  
83 overdosing. Sixty four percent (n=28) knew others who had experienced a lethal overdose in the  
84 last year.

85  
86 All participants (100%) reported ever re-using needles or equipment with 42% (n=19) reporting  
87 use of shared needles in the past year and 73% (n=33) reported sharing other drug preparation  
88 or use materials. The majority accessed (64%; n=29) and disposed (56%; n=25) of their needles  
89 through needle exchange programs. Bluetoothing was practiced in 18% (n=8) of individuals in  
90 the last 12 months.

91  
92 More than half (60%; n=27) had ever participated in a drug treatment program. The majority  
93 (96%; n=43) had ever tested for HIV. Thirty-five percent of individuals (n=15) were known to be  
94 living with HIV but only six (40%) reported accessing antiretroviral therapy within the past 12  
95 months. Only one individual (2%) was taking pre-exposure prophylaxis (PrEP). None of the  
96 participants had ever tested for Hepatitis C.

97

## 98 **Discussion:**

99 In this study we found high rates of unsafe injection drug practices that included sharing and re-  
100 using needles and drug preparation materials, as well as the practice of directly injecting blood  
101 from an individual who had recently injected (bluetoothing). These practices, if widespread  
102 amongst PWID, coupled with the low uptake of treatment and preventative services described in

103 this study, including HIV testing, PrEP and ART services, could negate some of the efforts  
104 made in the HIV prevention and treatment continuum of care in South Africa.

105  
106 The current and substantial efforts to combat the HIV epidemic in South Africa do not  
107 adequately address the needs of PWID. Although efforts are increasing to routinely screen for  
108 alcohol use in HIV care across South Africa, (23) screening for drug use (and injection drug use  
109 specifically) is not routinely conducted, and treatment for drug use disorder is rarely integrated  
110 with HIV care services.

111  
112 While the COVID-19 pandemic slowed progress globally to provide access to harm reduction  
113 and health services to people who use drugs, parts of South Africa saw a positive shift from a  
114 once, a prohibitionist stance to dealing with drug use disorder to one that supports the provision  
115 of evidence-based harm reduction practices, especially to low-income and homeless people  
116 who use drugs. Nationally, needle exchange programs, harm reduction services, and  
117 medication assisted treatment are often difficult to access either due to their high-priced, fee-for-  
118 service models or limited availability. (24) KwaZulu-Natal's only needle and syringe exchange  
119 program in Durban was reinstated during the COVID-19 lockdown, and the country's first low-  
120 threshold harm reduction center was started in Durban to provide daily opiate substitution  
121 therapy to more than 200 PWID. The limited resources available for harm reduction services  
122 have historically resulted in punishment of substance use as the predominant response by law  
123 enforcement to opiate addiction. (25) However after the COVID-19 lockdowns, Durban also saw  
124 a dramatic shift in the way that law enforcement engaged with people who use drugs, shifting  
125 the narrative of police as punitive to one of protectors and advocates of health services for  
126 PWID. (26, 27) Continued work is needed to reduce ongoing stigma towards PWID which limits  
127 access to HIV prevention services and harm reduction programs. (28, 29)

128

129 Without the availability of widespread interventions, injection drug use has continued to increase  
130 in South Africa with a prevalence of 0.6% in a population based survey in 2012 with 0.2%  
131 reporting Whoonga use. (30) However, small pilot studies have shown high retention rates,  
132 opiate reduction, and improvement in mental health in individuals accessing methadone  
133 treatment in South Africa. (31) Nevertheless, the lack of routine hepatitis C testing and access  
134 to PrEP indicate significant gaps in service delivery. Integration of harm reduction services into  
135 routine healthcare could impact the rising use of opiates and the HIV epidemic in South Africa.  
136

137 The major limitations of this study include the small sample size and descriptive nature of this  
138 preliminary study. In addition, this study was conducted during the COVID-19 pandemic when  
139 services were interrupted by various lockdown policies. During this time, there was also an  
140 influx of new people into the city who may not have been familiar with available services. Unsafe  
141 drug use practices may have occurred as a result of disruption of needles and other safe use  
142 supplies during lockdown. However, we are encouraged by the ability to recruit a difficult to  
143 reach population through respondent-driven sampling over a short period of time (3 months)  
144 and using only 3 initial seed individuals.

145  
146 **Conclusion:** The increased prevalence of injection drug use in South Africa along with unsafe  
147 injection practices and low uptake of preventative and treatment services, in particular HIV  
148 related services, has potential to reverse the significant gains made in HIV prevention services.  
149 Integration of addition services, medication assisted treatment and access to HIV prevention  
150 and treatment services could improve the lives of PWID and reduce the burden of HIV in this  
151 population.

152 **Table 1:** Descriptive statistics of individuals recruited through respondent-driven sampling and  
 153 self-reporting recent injection drug use in KwaZulu-Natal, South Africa.  
 154

| Characteristic                                                       | Participants n (%)<br>N=45 |
|----------------------------------------------------------------------|----------------------------|
| <b>Demographics</b>                                                  |                            |
| Median Age (years)(IQR)                                              | 28.5 (26.6 – 32.3)         |
| Male                                                                 | 26 (58%)                   |
| Heterosexual                                                         | 41 (91%)                   |
| Single                                                               | 17 (39%)                   |
| Long term partner but not married and not living together            | 26 (59%)                   |
| Several casual partners                                              | 2 (5%)                     |
| South African citizen                                                | 45 (100%)                  |
| <b>Education</b>                                                     |                            |
| Primary education                                                    | 4 (9%)                     |
| Secondary education                                                  | 39 (87%)                   |
| Tertiary level                                                       | 2 (4%)                     |
| Median grade completed (IQR)                                         | 10 (10 – 11)               |
| <b>Employment</b>                                                    |                            |
| Full time employed                                                   | 1 (2%)                     |
| Employed part time                                                   | 11 (24%)                   |
| Unemployed                                                           | 17 (38%)                   |
| <b>Housing</b>                                                       |                            |
| Homeless in the past 12 months                                       | 42 (93%)                   |
| Currently homeless                                                   | 32 (76%)                   |
| <b>Alcohol Use</b>                                                   |                            |
| No alcohol in the past year                                          | 29 (64%)                   |
| Binge drinking more than once a month                                | 10 (22%)                   |
| <b>Injection drug use</b>                                            |                            |
| Used injection drugs                                                 | 45 (100%)                  |
| Median age at first use (years) (IQR)                                | 22 (19 – 26)               |
| Last used injection drugs in the past month                          | 42 (93%)                   |
| Injecting more than once a day                                       | 41 (91%)                   |
| Injecting daily                                                      | 2 (4%)                     |
| Injecting more than once a week                                      | 2 (4%)                     |
| Using Whoonga/heroin daily or more                                   | 45 (100%)                  |
| Had an opioid overdose (in last year)                                | 10 (22%)                   |
| Median number of opioid overdoses (IQR) (in last year)               | 3.5 (2 – 4.75)             |
| Know of others who experienced lethal opioid overdose (in last year) | 29 (64%)                   |
| Median overdose deaths known about (in last year)                    | 2 (1 -3)                   |
| Know of others with non-lethal opioid overdose (in last year)        | 28 (62%)                   |
| <b>Most common place acquired needles</b>                            |                            |
| Needle exchange or NGO                                               | 29 (64%)                   |



|                                                                                     |             |
|-------------------------------------------------------------------------------------|-------------|
| Friend / acquaintance                                                               | 4 (11%)     |
| Pharmacy                                                                            | 1 (4%)      |
| <b>Dispose of needle</b>                                                            |             |
| Needle exchange or NGO                                                              | 25 (56%)    |
| On the street                                                                       | 8 (8%)      |
| Trash                                                                               | 7 (16%)     |
| <b>High risk Injection Drug Use</b>                                                 |             |
| New / unused Needle use in last 12 months                                           |             |
| Always                                                                              | 14 (31%)    |
| Sometimes                                                                           | 22 (49%)    |
| Rarely                                                                              | 9 (20%)     |
| Never                                                                               | 0 (0%)      |
| Median number of people shared needles with in last 12 months (IQR)                 | 0 (0 -3)    |
| Median number of people shared other drug-use material with in last 12 months (IQR) | 3 (0 – 5)   |
| Median number of people shared drugs with in the last 12 months (IQR)               | 3 (1 – 4)   |
| Used a shared needle in the past 12 months                                          | 19 (42%)    |
| Used shared material in last 12 months                                              | 33 (73%)    |
| Bluetoothing in the last 12 months                                                  | 8 (18%)     |
| Re-used needle from someone else at last injection                                  | 10 (22%)    |
| Bluetoothing at last injection                                                      | 2 (4%)      |
| Did not dispose of needle at last injection                                         | 29 (64%)    |
| Injected with known HIV+ individual                                                 | 6 (13%)     |
| Other drug use in last year                                                         | 24 (53%)    |
| <b>Healthcare Services</b>                                                          |             |
| Participated in a drug treatment program                                            | 27 (60%)    |
| Ever tested for HIV                                                                 | 43 (96%)    |
| Known to be living with HIV                                                         | 15 (35%)    |
| Accessing ART in the last 12 months                                                 | 6 (40%)     |
| Median number of HIV tests in last 2 years                                          | 3 (1 – 8.5) |
| Never tested for Hepatitis C                                                        | 45 (100%)   |
| Currently taking PrEP                                                               | 1 (2%)      |
| Interested in PrEP                                                                  | 24 (53%)    |

### Competing Interests:

The authors have no conflicts of interest relevant to this article to disclose.

### Author's Contributions:

Dr. Zaroni conceptualized and designed the study, performed the data analysis, drafted the initial manuscript, reviewed and revised the manuscript and approved the final manuscript as submitted.

Kedibone Sithole performed the data collection, contributed to the drafting of the manuscript, critically reviewed the manuscript and approved the final manuscript as submitted.

Nzwakie Mosery performed the data collection, contributed to the drafting of the manuscript, critically reviewed the manuscript and approved the final manuscript as submitted.

Michael Wilson assisted with the conceptualization and design of the study, contributed to the data collection, and critically reviewed the manuscript, and approved the final manuscript as submitted.

Shannon Bosman contributed to the data collection, and critically reviewed the manuscript, and approved the final manuscript as submitted.

Cecilia Milford assisted with the conceptualization and design of the study, contributed to the analysis plan, reviewed and revised the manuscript, and approved the final manuscript as submitted.

Jennifer Smit assisted with the conceptualization and design of the study, contributed to the analysis plan, reviewed and revised the manuscript, and approved the final manuscript as submitted.

#### **Funding:**

This work was supported via: Center for AIDS Research at Emory University (P30AI050409)

#### **References:**

1. Zuma K, Simbayi L, Zungu N, Moyo S, Marinda E, Jooste S, et al. The HIV Epidemic in South Africa: Key Findings from 2017 National Population-Based Survey. *Int J Environ Res Public Health*. 2022;19(13).
2. UNAIDS. Global Report: UNAIDS Report on the Global AIDS Epidemic 2021. Joint United Nations Programme on HIV/AIDS; 2021.
3. Zandoni BC, Elliott RJ, Neilan AM, Haberer JE. Screening for HIV and linkage to care in adolescents: insights from a systematic review of recent interventions in high- versus low- and middle-income settings. *Adolesc Health Med Ther*. 2018;9:211-35.
4. Scheibe A, Young K, Moses L, Basson RL, Versfeld A, Spearman CW, et al. Understanding hepatitis B, hepatitis C and HIV among people who inject drugs in South Africa: findings from a three-city cross-sectional survey. *Harm Reduct J*. 2019;16(1):28.
5. Meel R, Essop MR. Striking increase in the incidence of infective endocarditis associated with recreational drug abuse in urban South Africa. *S Afr Med J*. 2018;108(7):585-9.
6. Parry CD, Carney T, Petersen P, Dewing S, Needle R. HIV-risk behavior among injecting or non-injecting drug users in Cape Town, Pretoria, and Durban, South Africa. *Subst Use Misuse*. 2009;44(6):886-904.
7. Grelotti DJ, Closson EF, Smit JA, Mabude Z, Matthews LT, Safren SA, et al. Whoonga: potential recreational use of HIV antiretroviral medication in South Africa. *AIDS Behav*. 2014;18(3):511-8.

8. Rough K, Dietrich J, Essien T, Grelotti DJ, Bansberg DR, Gray G, et al. Whoonga and the abuse and diversion of antiretrovirals in Soweto, South Africa. *AIDS Behav.* 2014;18(7):1378-80.
9. Tyree GA, Mosery N, Closson EF, Mabude Z, du Toit C, Bangsberg DR, et al. Trajectories of initiation for the heroin-based drug whoonga - qualitative evidence from South Africa. *Int J Drug Policy.* 2020;82:102799.
10. Face-to-Face Africa. Report reveals shocking “bluetoothing” habit among drug addicts in South Africa 2019 [Available from: <https://face2faceafrica.com/article/report-reveals-shocking-bluetoothing-habit-among-drug-addicts-in-south-africa-video>].
11. Aparks J. “Bluetoothing”: Why addicts in South Africa are injecting each other’s blood: Sky News; 2019 [Available from: <https://news.sky.com/story/bluetoothing-why-addicts-in-south-africa-are-injecting-each-others-blood-11388290>].
12. Asher AK, Hahn JA, Couture MC, Maher K, Page K. people who inject drugs, HIV risk, and HIV testing uptake in sub-Saharan Africa. *J Assoc Nurses AIDS Care.* 2013;24(6):e35-44.
13. McCurdy SA, Williams ML, Ross MW, Kilonzo GP, Leshabari MT. A theme issue by, for, and about Africa: new injecting practice increases HIV risk among drug users in Tanzania. *BMJ.* 2005;331(7519):778.
14. McCurdy SA, Williams ML, Kilonzo GP, Ross MW, Leshabari MT. Heroin and HIV risk in Dar es Salaam, Tanzania: youth hangouts, mageto and injecting practices. *AIDS Care.* 2005;17 Suppl 1:S65-76.
15. Kalichman SC, Simbayi LC, Kagee A, Toefy Y, Jooste S, Cain D, et al. Associations of poverty, substance use, and HIV transmission risk behaviors in three South African communities. *Soc Sci Med.* 2006;62(7):1641-9.
16. Scheibe A, Makapela D, Brown B, dos Santos M, Hariga F, Virk H, et al. HIV prevalence and risk among people who inject drugs in five South African cities. *Int J Drug Policy.* 2016;30:107-15.
17. van Heerden MS, Grimsrud AT, Seedat S, Myer L, Williams DR, Stein DJ. Patterns of substance use in South Africa: results from the South African Stress and Health study. *S Afr Med J.* 2009;99(5 Pt 2):358-66.
18. Nampula. Africa is heroin’s new highway to the west. *The Economist.* 2019;January 31, 2019.

19. Harris PA, Taylor R, Thielke R, Payne J, Gonzalez N, Conde JG. Research electronic data capture (REDCap)--a metadata-driven methodology and workflow process for providing translational research informatics support. *J Biomed Inform.* 2009;42(2):377-81.
20. Handanagic S, Finlayson T, Burnett JC, Broz D, Wejnert C, National HIVBSSG. HIV Infection and HIV-Associated Behaviors Among Persons Who Inject Drugs - 23 Metropolitan Statistical Areas, United States, 2018. *MMWR Morb Mortal Wkly Rep.* 2021;70(42):1459-65.
21. WHO Assist Working Group. The Alcohol, Smoking and Substance Involvement Screening Test (ASSIST): development, reliability and feasibility. *Addiction.* 2002;97(9):1183-94.
22. Rowan GA, Joe GW, Lehman WE, Knight K. A Brief Assessment for HIV Risk: The TCU HVHP Form. *J Correct Health Care.* 2016;22(3):225-39.
23. Lafort Y, Greener R, Roy A, Greener L, Ombidi W, Lessitala F, et al. Where Do Female Sex Workers Seek HIV and Reproductive Health Care and What Motivates These Choices? A Survey in 4 Cities in India, Kenya, Mozambique and South Africa. *PLoS One.* 2016;11(8):e0160730.
24. Myers BJ, Louw J, Pasche SC. Inequitable access to substance abuse treatment services in Cape Town, South Africa. *Subst Abuse Treat Prev Policy.* 2010;5:28.
25. Scheibe A SS, Versfeld A, Howell S, Marks M. Safe treatment and treatment of safety: call for a harm-reduction approach to drug-use disorders in South Africa. *South African Health Review.* 2017;2017(1):197 - 204.
26. Marks M, Scheibe A, Shelly S. High retention in an opioid agonist therapy project in Durban, South Africa: the role of best practice and social cohesion. *Harm Reduct J.* 2020;17(1):25.
27. Marks M WM, Shelly S. Police as advocates for harm reduction during COVID-19 in Durban: Shifting the dominant narrative. *Acta Criminologica: African Journal of Criminology & Victimology Special Edition: Impact of COVID-19.* 2020;33(3).
28. Treves-Kagan S, Steward WT, Ntswane L, Haller R, Gilvydis JM, Gulati H, et al. Why increasing availability of ART is not enough: a rapid, community-based study on how HIV-related stigma impacts engagement to care in rural South Africa. *BMC Public Health.* 2016;16:87.
29. HIV/TB Care. Statement in response to media reports of inappropriately discarded needles and syringes in Durban 2018 [Available from: <https://tbhivcare.org/statement-response-media-reports-inappropriately-discarded-needles-syringes-durban/>].
30. Peltzer K, Phaswana-Mafuya N. Drug use among youth and adults in a population-based survey in South Africa. *S Afr J Psychiatr.* 2018;24:1139.

31. Scheibe A, Shelly S, Gerardy T, von Homeyer Z, Schneider A, Padayachee K, et al. Six-month retention and changes in quality of life and substance use from a low-threshold methadone maintenance therapy programme in Durban, South Africa. *Addict Sci Clin Pract.* 2020;15(1):13.
